# Supplementary material for: Asymmetric iron–titanium pairs within ultrathin TiO2 nanosheets enable high-efficiency nitrate reduction to ammonia
Source: Royal Society of Chemistry journal article supplement (doi:10.1039/d4ta04873c), 2024-01-01
Supplement: d4ta04873c1.pdf [file d4ta04873c1.pdf]

Supporting Information

**Asymmetric iron–titanium pairs within ultrathin TiO<sub>2</sub> nanosheet enable high-efficiency nitrate reduction to ammonia**

## Supplementary Figures

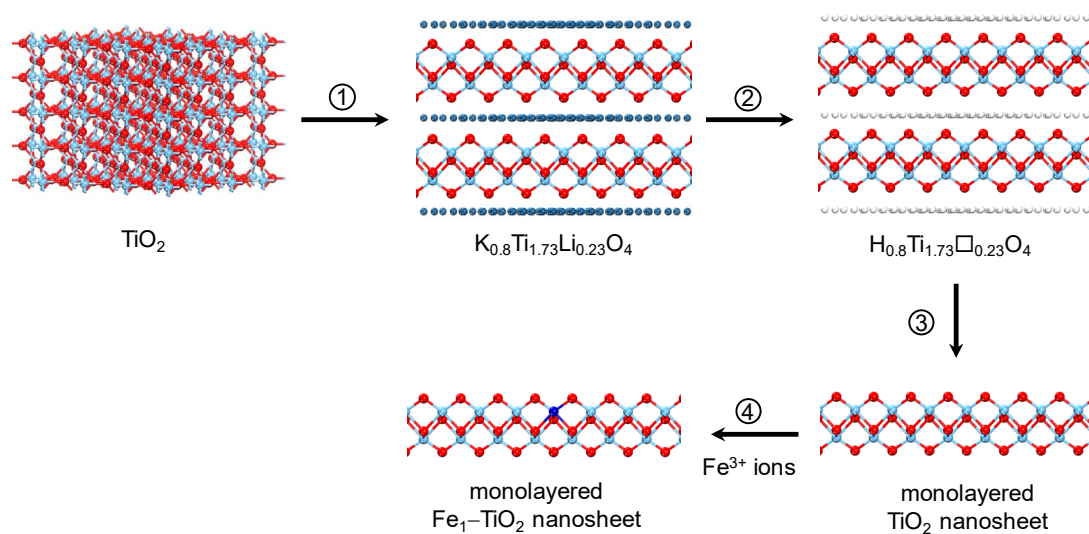

**Fig. S1.** Schematic diagram of the synthetic procedure of  $\text{Fe}_1\text{-TiO}_2$  nanosheet. Blue, cyan and red balls represent Fe, Ti and O atoms, respectively.

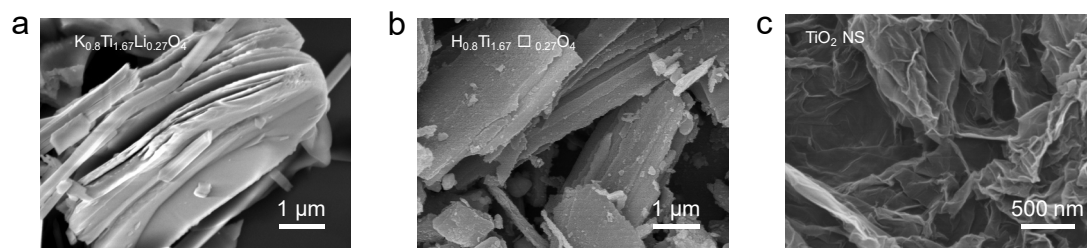

**Fig. S2.** (a) SEM image of  $K_{0.8}Ti_{1.67}Li_{0.27}Fe_{0.1}O_4$  nanosheet. (b) SEM image of  $H_{0.8}Ti_{1.67}\square_{0.27}Fe_{0.1}O_4$  nanosheet.

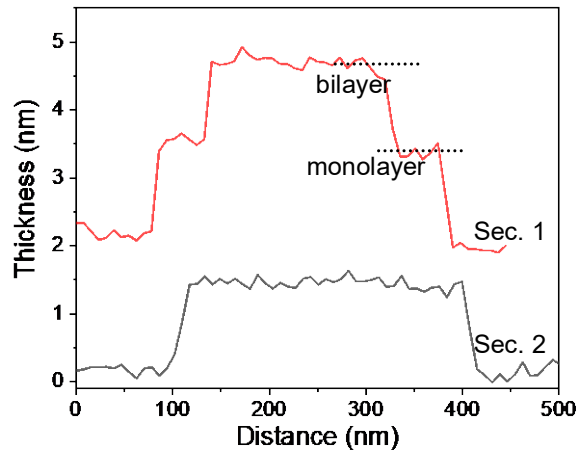

**Fig. S3.** The corresponding thickness of the marked sections in Fig. 1c.

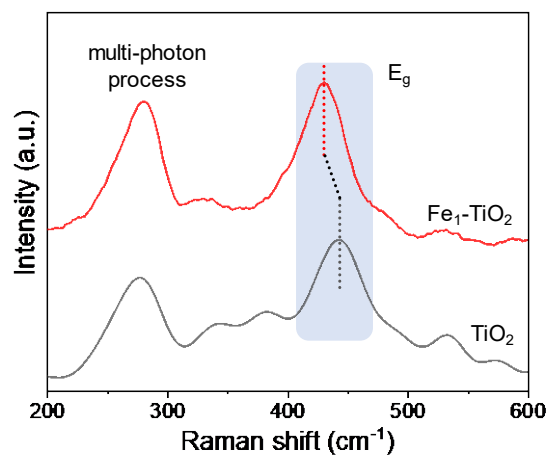

**Fig. S4.** Raman spectra of  $\text{Fe}_1\text{-TiO}_2$  and  $\text{TiO}_2$  nanosheet.

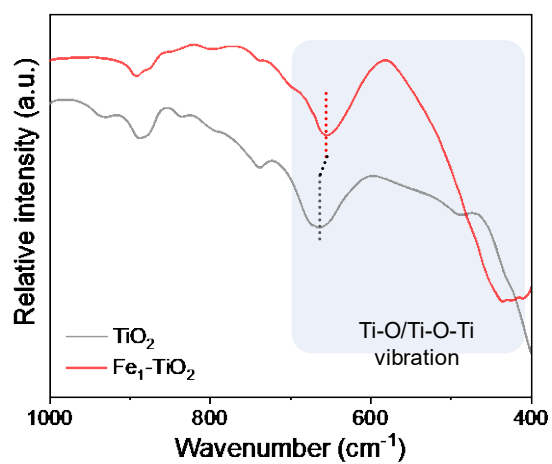

**Fig. S5.** Infrared spectrogram of  $\text{Fe}_1\text{-TiO}_2$  and  $\text{TiO}_2$  nanosheet.

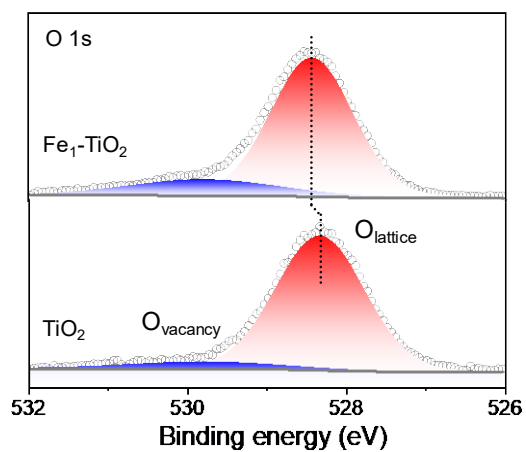

**Fig. S6.** XPS spectra of Fe<sub>1</sub>-TiO<sub>2</sub> and TiO<sub>2</sub> nanosheet in the O 1s regions.

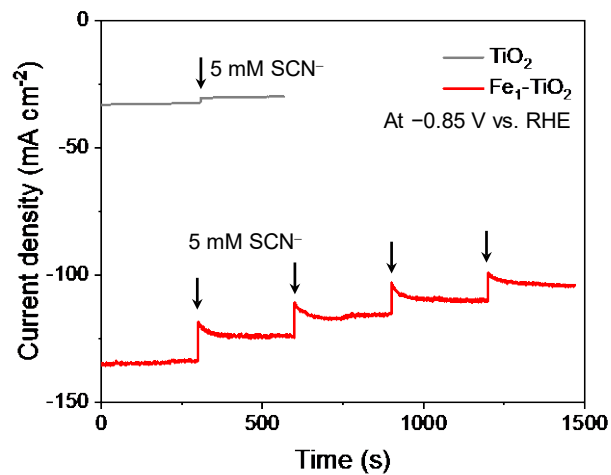

**Fig. S7.** The current density collected at  $-0.85$  V vs. RHE for  $\text{Fe}_1\text{-TiO}_2$  and  $\text{TiO}_2$  upon the addition of KSCN.



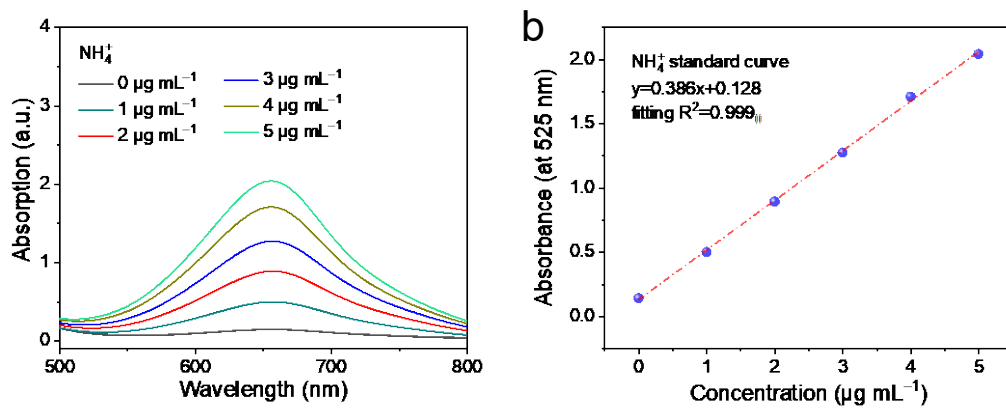

**Fig. S8.** The standard adsorption spectra of ammonia (a) and their linear fitting (b).

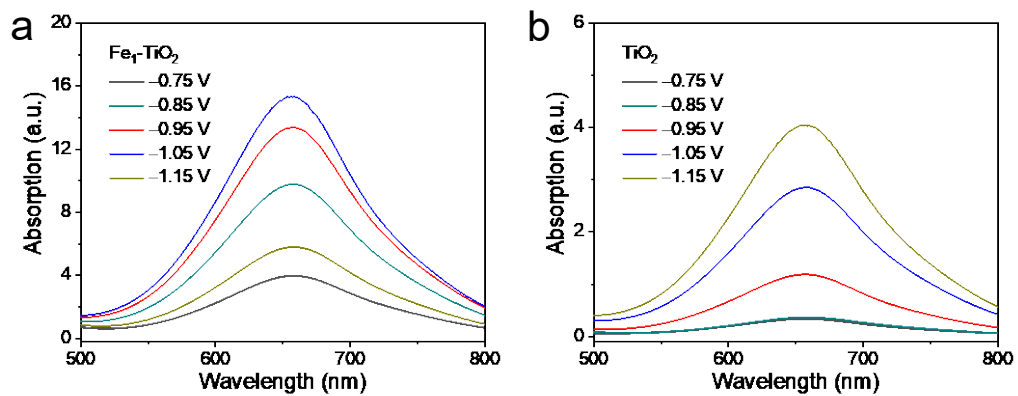

**Fig. S9.** (a) The adsorption spectra of ammonia after NRA on Fe<sub>1</sub>-TiO<sub>2</sub> nanosheet at each given potential. (b) The adsorption spectra of ammonia after NRA on TiO<sub>2</sub> nanosheet at each given potential.

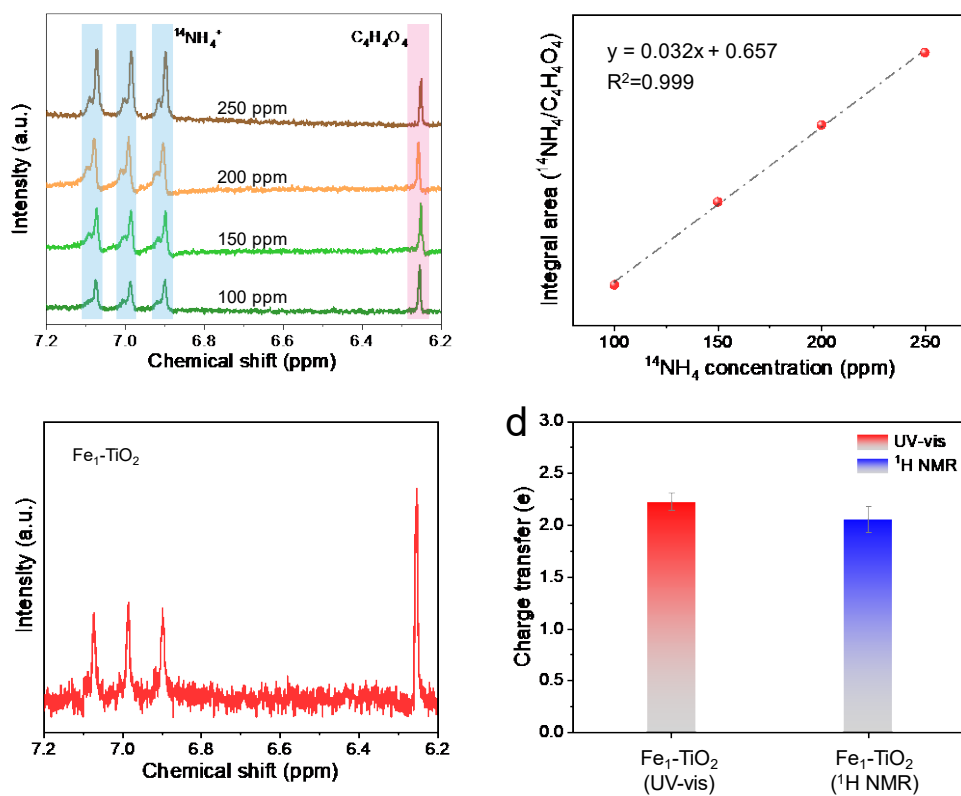

**Fig. S10.** The standard  $^1\text{H}$  NMR spectra of  $^{14}\text{NH}_4^+$  at various concentration (a) and their linear fitting (b). (c) The  $^1\text{H}$  NMR spectrum of the product obtained by electrocatalysis for 2 hours at  $-0.85$  V vs. RHE.

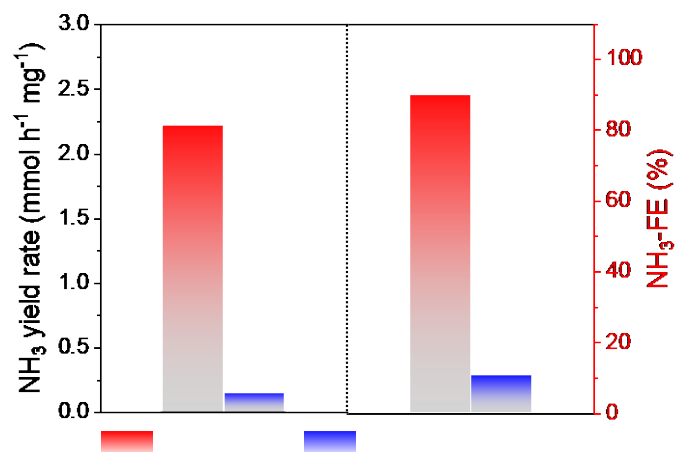

**Fig. S11.** NH<sub>3</sub> yields rate and FEs of Fe<sub>1</sub>-TiO<sub>2</sub> and TiO<sub>2</sub> nanosheet at -0.85V.

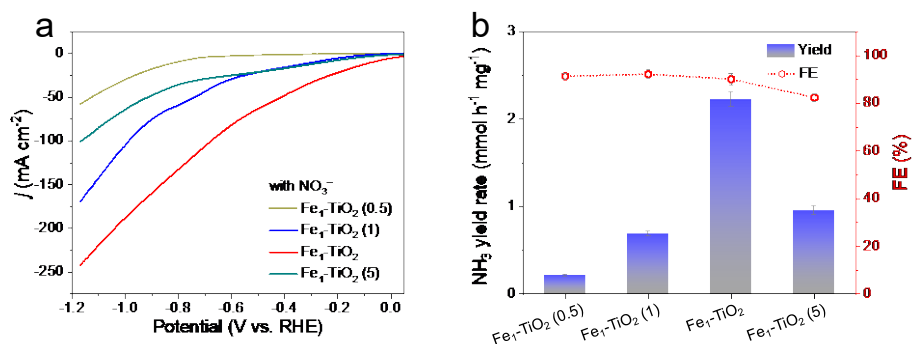

**Fig. S12.**  $\text{NH}_3$  yields rate and FEs of  $\text{Fe}_1\text{-TiO}_2$  with varied Fe loading amount. The collected LSV curves (a) and the corresponding FEs and ammonia yield rates (b) for  $\text{Fe}_1\text{-TiO}_2$  (0.5),  $\text{Fe}_1\text{-TiO}_2$  (1),  $\text{Fe}_1\text{-TiO}_2$  and  $\text{Fe}_1\text{-TiO}_2$  (5).

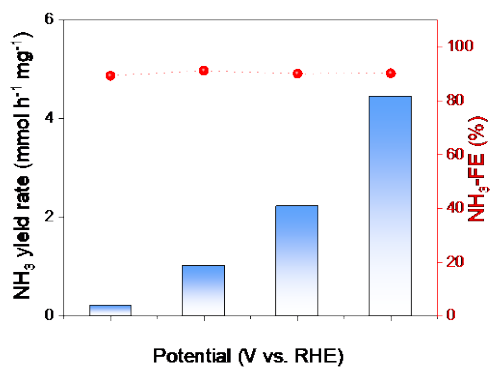

**Fig. S13.** The corresponding FEs and ammonia yield rates for Fe<sub>1</sub>-TiO<sub>2</sub> when varying the concentration of nitrate at 0.01, 0.05, 0.1 and 0.5 M.

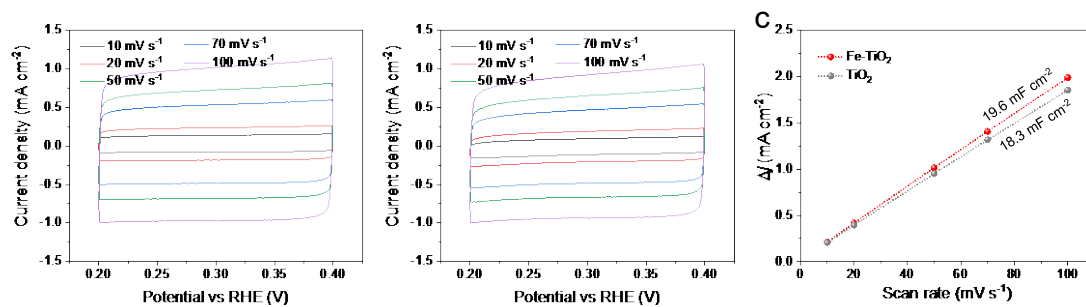

**Fig. S14.** CV curves obtained at various scan rates at non-Faradic potential windows for Fe<sub>1</sub>-TiO<sub>2</sub> (a) and TiO<sub>2</sub> (b). The extracted ECSA of Fe<sub>1</sub>-TiO<sub>2</sub> and TiO<sub>2</sub> from Fig. S11a and b.

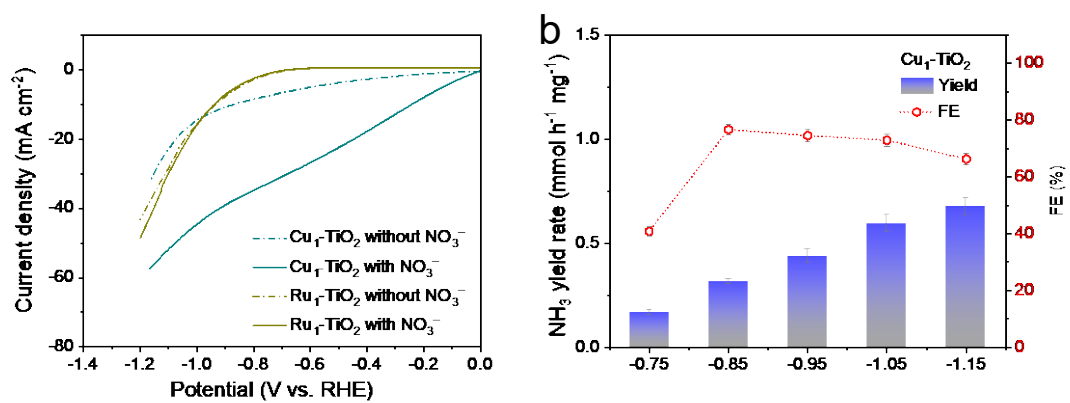

**Fig. S15.** (a) The collected LSV curves of Cu<sub>1</sub>-TiO<sub>2</sub> and Ru<sub>1</sub>-TiO<sub>2</sub> at the conditions of with and without nitrate. (b) The corresponding FEs and ammonia yield rates for Cu<sub>1</sub>-TiO<sub>2</sub> at different potentials.



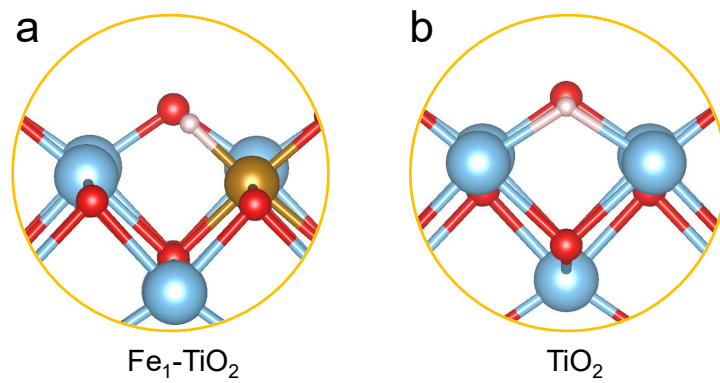

**Fig. S16.** Atomic arrangement diagram of Fe<sub>1</sub>-TiO<sub>2</sub> (a) and TiO<sub>2</sub> (b) nanosheet upon adsorption of proton.

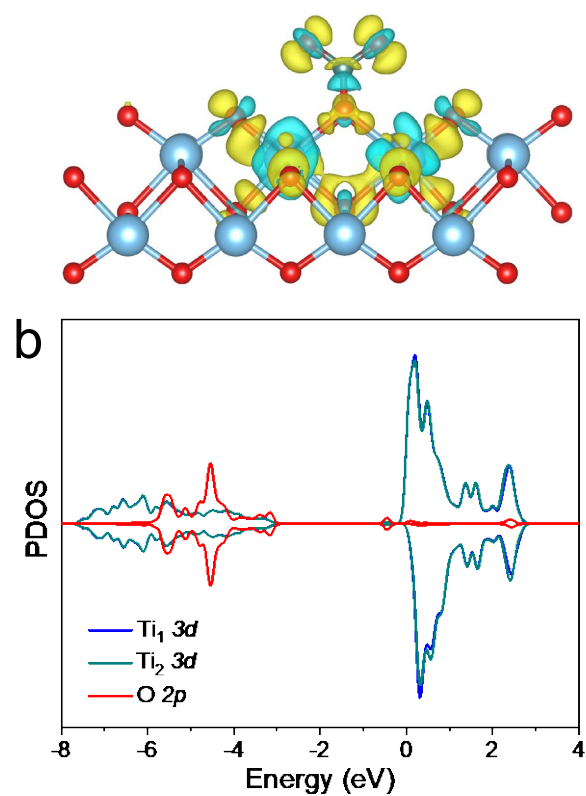

**Fig. S17.** (a) The differential charge density for  $\text{TiO}_2$  interface. Cyan and yellow isosurfaces (at level of  $0.01 \text{ e Bohr}^{-3}$ ) represent electron depletion and accumulation, and light blue, red, and green spheres denote the Ti, O, and nitrate atoms, respectively. (b) Projected DOS (pDOS) profile of  $\text{TiO}_2$  nanosheet upon adsorption of nitrate.

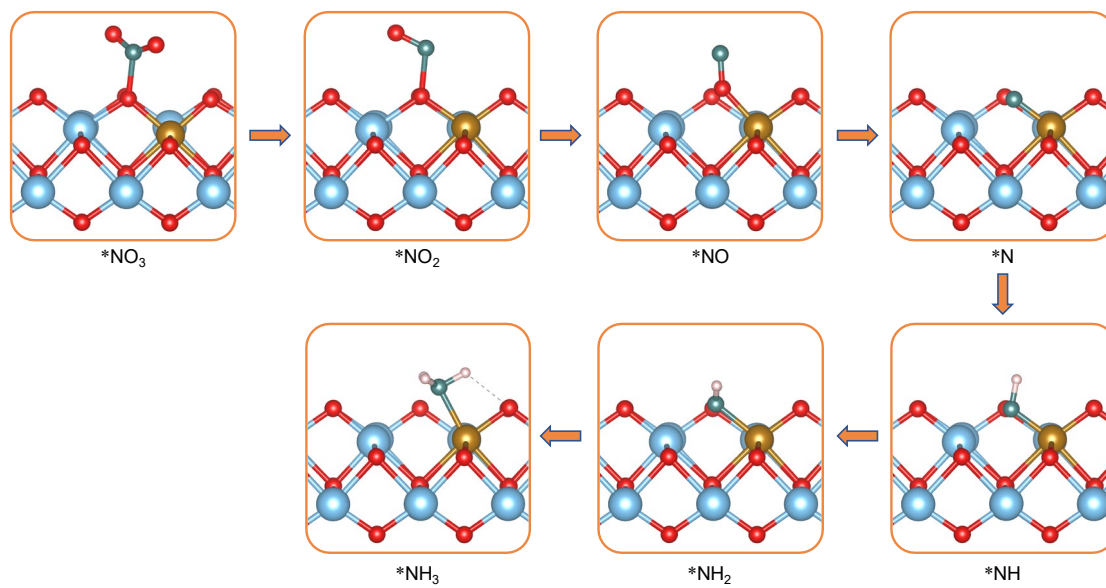

**Fig. S18.** The involved intermediates for nitrate reduction over Fe<sub>1</sub>-TiO<sub>2</sub>.

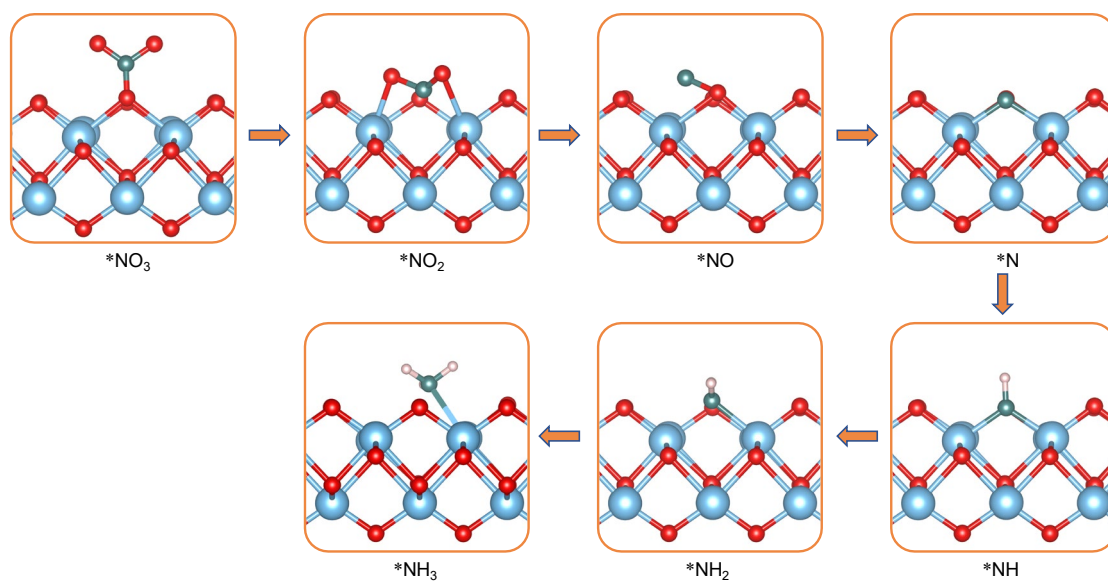

**Fig. S19.** The involved intermediates for nitrate reduction over TiO<sub>2</sub>.

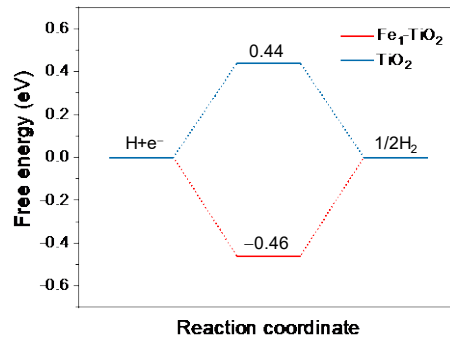

**Fig. S20.** The calculated Gibbs free energy of hydrogen evolution over Fe<sub>1</sub>-TiO<sub>2</sub> and TiO<sub>2</sub>.

**Table S1.** Structural parameters of Fe<sub>1</sub>-TiO<sub>2</sub> extracted from the EXAFS fitting. ( $S_0^2=0.8$ ). The C.N. represents coordination number.

| Sample                            | Scattering pair | C.N.          | R (Å)           | $\sigma^2$ ( $10^{-3}\text{Å}^2$ ) | $\Delta E_0$ (eV) |
|-----------------------------------|-----------------|---------------|-----------------|------------------------------------|-------------------|
| Fe <sub>1</sub> -TiO <sub>2</sub> | Fe-O            | $5.2 \pm 0.5$ | $1.94 \pm 0.02$ | $6.0 \pm 1.5$                      | $-4.9 \pm 1.6$    |

$S_0^2$  is the amplitude reduction factor  $S_0^2=0.8$ . C.N., R,  $\sigma^2$  and  $\Delta E_0$  are coordination number, scattering distance, Debye-Waller factor, and edge-energy shift, respectively.

**Table S2.** Comparison of nitrate-reduction performance of Fe<sub>1</sub>-TiO<sub>2</sub> with the reported catalysts in the previously literatures.

| Sample                               | FE <sub>NH<sub>3</sub></sub> | Yield Rate                                                                              | Potential vs. RHE     | Ref.      |
|--------------------------------------|------------------------------|-----------------------------------------------------------------------------------------|-----------------------|-----------|
| Fe <sub>1</sub> -TiO <sub>2</sub>    | 97.4%                        | 2.2 mmol h <sup>-1</sup> mg <sup>-1</sup><br>0.62 mmol h <sup>-1</sup> cm <sup>-2</sup> | -0.85 V               | This work |
| Co/TiO <sub>2</sub> NSs              | 97.4%                        | 0.22 mmol cm <sup>-2</sup> h <sup>-1</sup>                                              | -0.72 V               | 1         |
| FeOOH/CP                             | 92%                          | 901 μg h <sup>-1</sup> cm <sup>-2</sup>                                                 | -0.5 V                | 2         |
| FeCoNiAlTi                           | 95.23%                       | 0.52 mg h <sup>-1</sup> cm <sup>-2</sup>                                                | -0.5 V                | 3         |
| MPS-Cu<br>NDs/CF                     | 94.43%                       | 0.22 mmol h <sup>-1</sup> cm <sup>-2</sup>                                              | -1.2 V vs. SCE        | 4         |
| F-NFs/CF                             | 81.5%                        | 602.8 μg h <sup>-1</sup> cm <sup>-2</sup>                                               | -0.54 V               | 5         |
| Cu <sub>2</sub> O-NCs                | 92.9%                        | 56.2 mg h <sup>-1</sup> mg <sub>cat</sub> <sup>-1</sup>                                 | -0.85 V               | 6         |
| 10Cu/TiO <sub>2-x</sub>              | 81.34%                       | 0.11 mmol h <sup>-1</sup> mg <sup>-1</sup>                                              | -0.75 V               | 7         |
| a-RuO <sub>2</sub>                   | 97.46%                       | 0.12 mmol h <sup>-1</sup> cm <sup>-2</sup>                                              | -0.35 V               | 8         |
| Cu <sub>2</sub> O                    | 85.26%                       | 0.07 mmol h <sup>-1</sup> mg <sup>-1</sup>                                              | -1.2 V vs.<br>Ag/AgCl | 9         |
| Zn/Cu-2.3                            |                              | 5.8 mol g <sup>-1</sup> h <sup>-1</sup>                                                 | -0.85 V               | 10        |
| Co <sub>3</sub> O <sub>4</sub> /Co-h | 88.7 %                       | 0.26 mmol h <sup>-1</sup> cm <sup>-2</sup>                                              | -0.8 V                | 11        |
| TiO <sub>2-x</sub>                   | 85.0%                        | 0.05 mmol h <sup>-1</sup> mg <sup>-1</sup>                                              | -1.6 V vs. SCE        | 12        |
| V-Cu NAE                             | 95.1%                        | 7.85 mg h <sup>-1</sup> cm <sup>-2</sup>                                                | -0.3 V                | 13        |
| Cu nanotubes                         | 85.7%                        | 778.6 μg h <sup>-1</sup> mg <sup>-1</sup>                                               | -1.3 V vs. SCE        | 14        |
| Fe@Cu <sub>1</sub> FeO <sub>x</sub>  | 95.4%                        | 1.98 mg h <sup>-1</sup> cm <sup>-2</sup>                                                | -1.3 V vs. SCE        | 15        |
| Co-Fe@Fe <sub>2</sub> O <sub>3</sub> | 85.2%                        | 0.88 mg h <sup>-1</sup> cm <sup>-2</sup>                                                | -0.75 V               | 16        |
| Fe SAC                               | 75%                          | 0.52 mg h <sup>-1</sup> mg <sub>cat</sub> <sup>-1</sup>                                 | -0.66 V               | 17        |
| Fe-PPy SACs                          | ~100%                        | 2.75 mg h <sup>-1</sup> cm <sup>-2</sup>                                                | -0.7 V                | 18        |
| Pd-TiO <sub>2</sub>                  | 92.1%                        | 0.07 mmol cm <sup>-2</sup> h <sup>-1</sup>                                              | -0.7 V                | 19        |
| TiO <sub>2-x</sub>                   | 78.0%                        | 0.10 mmol cm <sup>-2</sup> h <sup>-1</sup>                                              | -1.0 V                | 20        |

## References

1. Y.-T. Xu, Y. Han, D. K. Sam and Y. Cao, *J. Mater. Chem. A*, 2022, **10**, 22390-22398.
2. Q. Liu, Q. Liu, L. Xie, Y. Ji, T. Li, B. Zhang, N. Li, B. Tang, Y. Liu and S. Gao, *ACS Appl. Mater. Interfaces*, 2022, **14**, 17312-17318.
3. R. Zhang, Y. Zhang, B. Xiao, S. Zhang, Y. Wang, H. Cui, C. Li, Y. Hou, Y. Guo and T. Yang, *Angew Chem Int. Ed.*, 2024, e202407589.
4. Z. Yu, J. Xie, T. Ren, H. Yu, K. Deng, Z. Wang, H. Wang, L. Wang and Y. Xu, *Inorg. Chem.*, 2023, **62**, 16228-16235.
5. W. Zhang, Y. Yao, Z. Chen, S. Zhao, F. Guo and L. Zhang, *Environ. Sci. Technol.*, 2024, **58**, 7208-7216.
6. X.-H. Wang, Z.-M. Wang, Q.-L. Hong, Z.-N. Zhang, F. Shi, D.-S. Li, S.-N. Li and Y. Chen, *Inorg. Chem.*, 2022, **61**, 15678-15685.
7. X. Zhang, C. Wang, Y. Guo, B. Zhang, Y. Wang and Y. Yu, *J. Mater. Chem. A*, 2022, **10**, 6448-6453.
8. Y. Wang, H. Li, W. Zhou, X. Zhang, B. Zhang and Y. Yu, *Angew Chem Int. Ed.*, 2022, **134**, e202202604.
9. Z. Gong, W. Zhong, Z. He, Q. Liu, H. Chen, D. Zhou, N. Zhang, X. Kang and Y. Chen, *Appl. Catal. B-Environ.*, 2022, **305**, 121021.
10. L. Wu, J. Feng, L. Zhang, S. Jia, X. Song, Q. Zhu, X. Kang, X. Xing, X. Sun and B. Han, *Angew Chem Int. Ed.*, 2023, **135**, e202307952.
11. F. Zhao, G. Hai, X. Li, Z. Jiang and H. Wang, *Chem. Eng. J.*, 2023, **461**, 141960.
12. R. Jia, Y. Wang, C. Wang, Y. Ling, Y. Yu and B. Zhang, *ACS Catal.*, 2020, **10**, 3533-3540.
13. B. Zhang, Z. Dai, Y. Chen, M. Cheng, H. Zhang, P. Feng, B. Ke, Y. Zhang and G. Zhang, *Nat. Commun.*, 2024, **15**, 2816.
14. C. Li, S. Liu, Y. Xu, T. Ren, Y. Guo, Z. Wang, X. Li, L. Wang and H. Wang, *Nanoscale*, 2022, **14**, 12332-12338.
15. B. Zhou, L. Yu, W. Zhang, X. Liu, H. Zhang, J. Cheng, Z. Chen, H. Zhang, M. Li and Y. Shi, *Angew Chem Int. Ed.*, 2024, e202406046.
16. S. Zhang, M. Li, J. Li, Q. Song and X. Liu, *P. Natl. Acad. Sci.*, 2022, **119**, e2115504119.
17. Z.-Y. Wu, M. Karamad, X. Yong, Q. Huang, D. A. Cullen, P. Zhu, C. Xia, Q. Xiao, M. Shakouri, F.-Y. Chen, J. Y. Kim, Y. Xia, K. Heck, Y. Hu, M. S. Wong, Q. Li, I. Gates, S. Siahrostami and H. Wang, *Nat. Commun.*, 2021, **12**, 2870.
18. P. Li, Z. Jin, Z. Fang and G. Yu, *Energy Environ. Sci.*, 2021, **14**, 3522-3531.
19. Y. Guo, R. Zhang, S. Zhang, Y. Zhao, Q. Yang, Z. Huang, B. Dong and C. Zhi, *Energy Environ. Sci.*, 2021, **14**, 3938-3944.
20. Z. Wei, X. Niu, H. Yin, S. Yu and J. Li, *Appl. Catal. A-Gen.*, 2022, **636**, 118596.
